# Supplementary material
Source: Elsevier journal article supplement (http://library.osu.edu/projects/msa/suppmat/v253.i1.pp1-15/mmc1.pdf)
Supplement: mmc1 [file mmc1.pdf]

Energies (in  $\text{cm}^{-1}$ ) of  $^{12}\text{CO}_2$  up to polyad 14 provided by the fit using the Hamiltonian (61) involving experimental energies up to polyad 11. The rms deviation obtained is  $0,75 \text{ cm}^{-1}$ . The number of bosons were taken to be  $N_s = 160$  and  $N = 150$

| State    | Polyad       | State<br>(normal) | Contribution<br>(normal) | State<br>(local) | Contribution<br>(local) | Exp.    | Energies<br>Theor. | $\Delta E$ |
|----------|--------------|-------------------|--------------------------|------------------|-------------------------|---------|--------------------|------------|
| Symmetry | $\Sigma_g^+$ |                   |                          |                  |                         |         |                    |            |
| 1        | 2            | 1 0 0             | 0.510                    | 0 0 1 1          | 0.490                   | 1285.41 | 1286.36            | -0.95      |
| 2        | 2            | 0 2 0             | 0.510                    | 0 0 1 1          | 0.510                   | 1388.19 | 1387.67            | 0.52       |
| 1        | 4            | 1 2 0             | 0.514                    | 0 0 2 2          | 0.291                   | 2548.37 | 2549.73            | -1.37      |
| 2        | 4            | 2 0 0             | 0.660                    | 0 0 2 2          | 0.335                   | 2671.14 | 2671.23            | -0.09      |
| 3        | 4            | 1 2 0             | 0.482                    | 0 0 2 2          | 0.374                   | 2797.14 | 2796.01            | 1.12       |
| 4        | 4            | 0 0 2             | 1.000                    | 1 1 0 0          | 0.503                   | 4673.33 | 4673.1             | 0.22       |
| 1        | 6            | 1 4 0             | 0.434                    | 1 0 2 2          | 0.434                   | 3792.7  | 3793.69            | -0.99      |
| 2        | 6            | 3 0 0             | 0.514                    | 0 0 3 3          | 0.248                   | 3942.49 | 3942.41            | 0.08       |
| 3        | 6            | 3 0 0             | 0.387                    | 0 0 3 3          | 0.310                   | 4064.28 | 4063.98            | 0.29       |
| 4        | 6            | 1 4 0             | 0.459                    | 0 0 3 3          | 0.277                   | 4225.1  | 4223.62            | 1.48       |
| 5        | 6            | 0 2 2             | 0.548                    | 1 1 1 1          | 0.276                   | 5915.21 | 5915.43            | -0.22      |
| 6        | 6            | 1 0 2             | 0.548                    | 1 1 1 1          | 0.227                   | 6016.69 | 6016.56            | 0.14       |
| 1        | 8            | 2 4 0             | 0.389                    | 1 1 2 2          | 0.194                   | -       | 5022.01            | -          |
| 2        | 8            | 3 2 0             | 0.336                    | 0 0 4 4          | 0.186                   | 5197.25 | 5196.33            | 0.92       |
| 3        | 8            | 4 0 0             | 0.555                    | 0 0 4 4          | 0.217                   | -       | 5328.84            | -          |
| 4        | 8            | 3 2 0             | 0.373                    | 0 0 4 4          | 0.302                   | 5475.56 | 5475.5             | 0.07       |
| 5        | 8            | 1 6 0             | 0.414                    | 1 0 3 3          | 0.414                   | -       | 5666.4             | -          |
| 6        | 8            | 1 2 2             | 0.507                    | 3 0 1 1          | 0.378                   | 7133.82 | 7133.75            | 0.06       |
| 7        | 8            | 2 0 2             | 0.660                    | 4 0 0 0          | 0.495                   | 7259.74 | 7259.78            | -0.04      |
| 8        | 8            | 1 2 2             | 0.492                    | 3 0 1 1          | 0.367                   | 7377.68 | 7377.94            | -0.26      |
| 9        | 8            | 0 0 4             | 1.000                    | 2 2 0 0          | 0.379                   | -       | 9246.85            | -          |
| 1        | 10           | 2 6 0             | 0.366                    | 1 1 3 3          | 0.182                   | -       | 6237.21            | -          |
| 2        | 10           | 4 2 0             | 0.352                    | 2 2 1 1          | 0.130                   | -       | 6433.05            | -          |
| 3        | 10           | 5 0 0             | 0.531                    | 3 2 0 0          | 0.328                   | -       | 6586.12            | -          |
| 4        | 10           | 5 0 0             | 0.295                    | 0 0 5 5          | 0.233                   | -       | 6725.03            | -          |
| 5        | 10           | 3 4 0             | 0.315                    | 0 0 5 5          | 0.278                   | -       | 6904.93            | -          |
| 6        | 10           | 1 8 0             | 0.364                    | 1 0 4 4          | 0.364                   | -       | 7121.6             | -          |
| 7        | 10           | 1 4 2             | 0.454                    | 3 0 2 2          | 0.338                   | -       | 8332.98            | -          |
| 8        | 10           | 3 0 2             | 0.454                    | 5 0 0 0          | 0.287                   | -       | 8487.74            | -          |
| 9        | 10           | 3 0 2             | 0.452                    | 1 1 3 3          | 0.144                   | -       | 8607.61            | -          |
| 10       | 10           | 1 4 2             | 0.451                    | 3 0 2 2          | 0.336                   | -       | 8758.01            | -          |
| 11       | 10           | 0 2 4             | 0.606                    | 2 2 1 1          | 0.230                   | -       | 10444.8            | -          |
| 12       | 10           | 1 0 4             | 0.606                    | 4 1 0 0          | 0.345                   | -       | 10547.1            | -          |
| 1        | 12           | 3 6 0             | 0.326                    | 1 1 4 4          | 0.149                   | -       | 7440.98            | -          |
| 2        | 12           | 5 2 0             | 0.266                    | 1 0 5 5          | 0.219                   | -       | 7654.96            | -          |
| 3        | 12           | 6 0 0             | 0.377                    | 0 0 6 6          | 0.123                   | -       | 7830.7             | -          |
| 4        | 12           | 6 0 0             | 0.460                    | 0 0 6 6          | 0.162                   | -       | 7972.46            | -          |
| 5        | 12           | 5 2 0             | 0.317                    | 0 0 6 6          | 0.248                   | -       | 8140.03            | -          |
| 6        | 12           | 4 4 0             | 0.264                    | 0 0 6 6          | 0.247                   | -       | 8348.62            | -          |
| 7        | 12           | 2 8 0             | 0.335                    | 1 1 4 4          | 0.166                   | -       | 8587.37            | -          |
| 8        | 12           | 2 4 2             | 0.376                    | 4 0 2 2          | 0.282                   | -       | 9517.              | -          |
| 9        | 12           | 3 2 2             | 0.368                    | 5 0 1 1          | 0.233                   | -       | 9696.85            | -          |
| 10       | 12           | 4 0 2             | 0.576                    | 6 0 0 0          | 0.278                   | -       | 9832.95            | -          |
| 11       | 12           | 3 2 2             | 0.376                    | 1 1 4 4          | 0.138                   | -       | 9971.32            | -          |
| 12       | 12           | 1 6 2             | 0.397                    | 3 0 3 3          | 0.296                   | -       | 10153.2            | -          |
| 13       | 12           | 1 2 4             | 0.493                    | 2 2 2 2          | 0.146                   | -       | 11618.             | -          |
| 14       | 12           | 2 0 4             | 0.644                    | 6 0 0 0          | 0.293                   | -       | 11749.5            | -          |
| 15       | 12           | 1 2 4             | 0.493                    | 4 1 1 1          | 0.281                   | -       | 11862.2            | -          |
| 16       | 12           | 0 0 6             | 1.000                    | 3 3 0 0          | 0.318                   | -       | 13722.1            | -          |
| 1        | 14           | 3 8 0             | 0.319                    | 2 1 4 4          | 0.238                   | -       | 8634.55            | -          |
| 2        | 14           | 5 4 0             | 0.288                    | 3 2 2 2          | 0.178                   | -       | 8864.23            | -          |
| 3        | 14           | 6 2 0             | 0.301                    | 3 3 1 1          | 0.092                   | -       | 9060.48            | -          |
| 4        | 14           | 7 0 0             | 0.522                    | 4 3 0 0          | 0.280                   | -       | 9215.51            | -          |
| 5        | 14           | 6 2 0             | 0.300                    | 0 0 7 7          | 0.185                   | -       | 9372.51            | -          |
| 6        | 14           | 5 4 0             | 0.274                    | 0 0 7 7          | 0.249                   | -       | 9571.71            | -          |
| 7        | 14           | 4 6 0             | 0.272                    | 0 0 7 7          | 0.216                   | -       | 9804.09            | -          |
| 8        | 14           | 2 10 0            | 0.331                    | 1 1 5 5          | 0.164                   | -       | 10062.3            | -          |
| 9        | 14           | 2 6 2             | 0.373                    | 4 0 3 3          | 0.279                   | -       | 10688.3            | -          |
| 10       | 14           | 4 2 2             | 0.335                    | 3 0 4 4          | 0.168                   | -       | 10888.8            | -          |
| 11       | 14           | 5 0 2             | 0.485                    | 6 1 0 0          | 0.197                   | -       | 11048.             | -          |
| 12       | 14           | 5 0 2             | 0.363                    | 1 1 5 5          | 0.113                   | -       | 11182.7            | -          |
| 13       | 14           | 3 4 2             | 0.292                    | 1 1 5 5          | 0.127                   | -       | 11352.7            | -          |
| 14       | 14           | 1 8 2             | 0.342                    | 3 0 4 4          | 0.255                   | -       | 11560.7            | -          |
| 15       | 14           | 1 4 4             | 0.467                    | 4 1 2 2          | 0.266                   | -       | 12772.7            | -          |
| 16       | 14           | 3 0 4             | 0.388                    | 2 2 3 3          | 0.117                   | -       | 12933.6            | -          |
| 17       | 14           | 3 0 4             | 0.513                    | 7 0 0 0          | 0.275                   | -       | 13053.8            | -          |
| 18       | 14           | 1 4 4             | 0.436                    | 4 1 2 2          | 0.248                   | -       | 13195.2            | -          |
| 19       | 14           | 0 2 6             | 0.660                    | 3 3 1 1          | 0.210                   | -       | 14875.2            | -          |
| 20       | 14           | 1 0 6             | 0.660                    | 5 2 0 0          | 0.287                   | -       | 14980.1            | -          |

| State    | Polyad       | State<br>(normal) | Contribution<br>(normal) | State<br>(local) | Contribution<br>(local) | Exp.    | Energies<br>Theor. | $\Delta E$ |
|----------|--------------|-------------------|--------------------------|------------------|-------------------------|---------|--------------------|------------|
| Symmetry | $\Sigma_u^+$ |                   |                          |                  |                         |         |                    |            |
| 1        | 2            | 0 0 1             | 1.000                    | 1 0 0 0          | 1.000                   | 2349.14 | 2349.02            | 0.12       |
| 1        | 4            | 0 2 1             | 0.519                    | 1 0 1 1          | 0.519                   | 3612.84 | 3613.42            | -0.58      |
| 2        | 4            | 1 0 1             | 0.519                    | 2 0 0 0          | 0.519                   | 3714.78 | 3714.46            | 0.33       |
| 1        | 6            | 1 2 1             | 0.512                    | 2 0 1 1          | 0.512                   | 4853.62 | 4854.27            | -0.65      |
| 2        | 6            | 2 0 1             | 0.662                    | 3 0 0 0          | 0.500                   | 4977.84 | 4977.9             | -0.07      |
| 3        | 6            | 1 2 1             | 0.488                    | 2 0 1 1          | 0.488                   | 5099.66 | 5099.24            | 0.42       |
| 4        | 6            | 0 0 3             | 1.000                    | 2 1 0 0          | 0.754                   | 6972.58 | 6972.34            | 0.24       |
| 1        | 8            | 1 4 1             | 0.445                    | 2 0 2 2          | 0.445                   | 6075.98 | 6075.84            | 0.14       |
| 2        | 8            | 3 0 1             | 0.485                    | 1 0 3 3          | 0.263                   | 6227.92 | 6227.56            | 0.36       |
| 3        | 8            | 3 0 1             | 0.420                    | 1 0 3 3          | 0.298                   | 6347.85 | 6348.02            | -0.17      |
| 4        | 8            | 1 4 1             | 0.456                    | 2 0 2 2          | 0.456                   | 6503.08 | 6503.03            | 0.05       |
| 5        | 8            | 0 2 3             | 0.578                    | 2 1 1 1          | 0.436                   | 8192.55 | 8192.51            | 0.04       |
| 6        | 8            | 1 0 3             | 0.578                    | 2 1 1 1          | 0.319                   | 8293.95 | 8294.07            | -0.12      |
| 1        | 10           | 2 4 1             | 0.383                    | 2 0 3 3          | 0.335                   | 7283.98 | 7281.98            | 2.00       |
| 2        | 10           | 3 2 1             | 0.354                    | 1 0 4 4          | 0.202                   | 7460.52 | 7459.09            | 1.43       |
| 3        | 10           | 4 0 1             | 0.568                    | 4 1 0 0          | 0.316                   | 7593.69 | 7593.19            | 0.50       |
| 4        | 10           | 3 2 1             | 0.376                    | 1 0 4 4          | 0.289                   | 7734.45 | 7735.57            | -1.12      |
| 5        | 10           | 1 6 1             | 0.407                    | 2 0 3 3          | 0.407                   | 7920.84 | 7921.97            | -1.13      |
| 6        | 10           | 1 2 3             | 0.501                    | 2 1 2 2          | 0.272                   | 9388.99 | 9388.31            | 0.68       |
| 7        | 10           | 2 0 3             | 0.654                    | 5 0 0 0          | 0.404                   | 9516.97 | 9516.93            | 0.04       |
| 8        | 10           | 1 2 3             | 0.494                    | 3 1 1 1          | 0.252                   | 9631.35 | 9632.23            | -0.88      |
| 9        | 10           | 0 0 5             | 1.000                    | 3 2 0 0          | 0.632                   | -       | 11496.7            | -          |
| 1        | 12           | 2 6 1             | 0.370                    | 3 0 3 3          | 0.279                   | -       | 8475.2             | -          |
| 2        | 12           | 4 2 1             | 0.345                    | 2 0 4 4          | 0.228                   | -       | 8673.38            | -          |
| 3        | 12           | 5 0 1             | 0.511                    | 5 1 0 0          | 0.255                   | -       | 8829.48            | -          |
| 4        | 12           | 5 0 1             | 0.328                    | 1 0 5 5          | 0.229                   | -       | 8965.97            | -          |
| 5        | 12           | 3 4 1             | 0.305                    | 1 0 5 5          | 0.265                   | -       | 9140.94            | -          |
| 6        | 12           | 1 8 1             | 0.353                    | 2 0 4 4          | 0.353                   | -       | 9353.29            | -          |
| 7        | 12           | 1 4 3             | 0.461                    | 3 1 2 2          | 0.235                   | -       | 10565.2            | -          |
| 8        | 12           | 3 0 3             | 0.421                    | 6 0 0 0          | 0.263                   | -       | 10723.             | -          |
| 9        | 12           | 3 0 3             | 0.483                    | 6 0 0 0          | 0.302                   | -       | 10842.8            | -          |
| 10       | 12           | 1 4 3             | 0.444                    | 3 1 2 2          | 0.226                   | -       | 10988.7            | -          |
| 11       | 12           | 0 2 5             | 0.634                    | 3 2 1 1          | 0.401                   | -       | 12672.3            | -          |
| 12       | 12           | 1 0 5             | 0.633                    | 5 1 0 0          | 0.317                   | -       | 12775.8            | -          |
| 1        | 14           | 3 6 1             | 0.320                    | 3 0 4 4          | 0.233                   | -       | 9657.14            | -          |
| 2        | 14           | 4 4 1             | 0.270                    | 2 0 5 5          | 0.225                   | -       | 9873.08            | -          |
| 3        | 14           | 6 0 1             | 0.342                    | 5 2 0 0          | 0.140                   | -       | 10052.             | -          |
| 4        | 14           | 6 0 1             | 0.486                    | 5 2 0 0          | 0.198                   | -       | 10194.             | -          |
| 5        | 14           | 5 2 1             | 0.324                    | 1 0 6 6          | 0.243                   | -       | 10356.6            | -          |
| 6        | 14           | 4 4 1             | 0.274                    | 1 0 6 6          | 0.235                   | -       | 10560.6            | -          |
| 7        | 14           | 2 8 1             | 0.338                    | 2 0 5 5          | 0.303                   | -       | 10795.1            | -          |
| 8        | 14           | 2 4 3             | 0.367                    | 5 0 2 2          | 0.227                   | -       | 11727.2            | -          |
| 9        | 14           | 3 2 3             | 0.378                    | 6 0 1 1          | 0.236                   | -       | 11909.7            | -          |
| 10       | 14           | 4 0 3             | 0.577                    | 7 0 0 0          | 0.322                   | -       | 12048.2            | -          |
| 11       | 14           | 3 2 3             | 0.373                    | 6 0 1 1          | 0.233                   | -       | 12182.9            | -          |
| 12       | 14           | 1 6 3             | 0.387                    | 5 0 2 2          | 0.202                   | -       | 12360.2            | -          |
| 13       | 14           | 1 2 5             | 0.483                    | 3 2 2 2          | 0.258                   | -       | 13823.1            | -          |
| 14       | 14           | 2 0 5             | 0.631                    | 6 1 0 0          | 0.275                   | -       | 13957.4            | -          |
| 15       | 14           | 1 2 5             | 0.490                    | 5 1 1 1          | 0.245                   | -       | 14068.1            | -          |
| 16       | 14           | 0 0 7             | 1.000                    | 4 3 0 0          | 0.557                   | -       | 15923.1            | -          |
| Symmetry | $\Pi_g$      |                   |                          |                  |                         |         |                    |            |
| 1        | 3            | 0 1 1             | 1.000                    | 1 0 1 0          | 1.00                    | 3004.01 | 3004.07            | -0.05      |
| 1        | 5            | 1 1 1             | 0.507                    | 2 0 1 0          | 0.507                   | 4247.71 | 4248.42            | -0.71      |
| 2        | 5            | 0 3 1             | 0.507                    | 1 0 2 1          | 0.507                   | 4390.63 | 4390.26            | 0.37       |
| 1        | 7            | 1 3 1             | 0.509                    | 2 0 2 1          | 0.509                   | 5475.08 | 5475.54            | -0.47      |
| 2        | 7            | 2 1 1             | 0.594                    | 3 0 1 0          | 0.448                   | 5632.77 | 5632.94            | -0.17      |
| 3        | 7            | 1 3 1             | 0.488                    | 2 0 2 1          | 0.488                   | 5790.58 | 5790.22            | 0.36       |
| 4        | 7            | 0 1 3             | 1.00                     | 2 1 1 0          | 0.754                   | 7602.52 | 7602.42            | 0.09       |
| 1        | 9            | 1 5 1             | 0.408                    | 2 0 3 2          | 0.408                   | 6688.18 | 6687.38            | 0.80       |
| 2        | 9            | 3 1 1             | 0.468                    | 1 0 4 3          | 0.285                   | 6863.56 | 6863.23            | 0.33       |
| 3        | 9            | 3 1 1             | 0.387                    | 1 0 4 3          | 0.337                   | 7023.68 | 7024.17            | -0.49      |
| 4        | 9            | 1 5 1             | 0.442                    | 2 0 3 2          | 0.442                   | 7203.82 | 7204.18            | -0.36      |
| 5        | 9            | 0 3 3             | 0.536                    | 2 1 2 1          | 0.404                   | 8803.27 | 8803.12            | 0.15       |
| 6        | 9            | 1 1 3             | 0.536                    | 2 1 2 1          | 0.350                   | 8944.15 | 8944.43            | -0.28      |
| 1        | 11           | 2 5 1             | 0.388                    | 3 0 3 2          | 0.293                   | -       | 7885.9             | -          |
| 2        | 11           | 3 3 1             | 0.300                    | 2 0 4 3          | 0.214                   | 8080.89 | 8080.11            | 0.78       |
| 3        | 11           | 4 1 1             | 0.487                    | 4 1 1 0          | 0.270                   | 8250.63 | 8250.69            | -0.06      |
| 4        | 11           | 3 3 1             | 0.360                    | 1 0 5 4          | 0.294                   | 8425.   | 8426.87            | -1.87      |
| 5        | 11           | 1 7 1             | 0.387                    | 2 0 4 3          | 0.387                   | -       | 8630.71            | -          |
| 6        | 11           | 1 3 3             | 0.506                    | 3 1 2 1          | 0.258                   | 9987.48 | 9986.14            | 1.34       |
| 7        | 11           | 2 1 3             | 0.594                    | 5 0 1 0          | 0.366                   | 10145.5 | 10145.6            | -0.07      |
| 8        | 11           | 1 3 3             | 0.493                    | 3 1 2 1          | 0.251                   | 10297.1 | 10298.4            | -1.39      |
| 9        | 11           | 0 1 5             | 1.00                     | 3 2 1 0          | 0.633                   | -       | 12102.             | -          |

| State    | Polyad | State<br>(normal) | Contribution<br>(normal) | State<br>(local) | Contribution<br>(local) | Exp.    | Energies |            |
|----------|--------|-------------------|--------------------------|------------------|-------------------------|---------|----------|------------|
|          |        |                   |                          |                  |                         |         | Theor.   | $\Delta E$ |
| 1        | 13     | 2 7 1             | 0.349                    | 3 0 4 3          | 0.263                   | -       | 9072.71  | -          |
| 2        | 13     | 4 3 1             | 0.337                    | 2 0 5 4          | 0.240                   | -       | 9283.89  | -          |
| 3        | 13     | 5 1 1             | 0.455                    | 5 1 1 0          | 0.228                   | -       | 9467.95  | -          |
| 4        | 13     | 5 1 1             | 0.309                    | 1 0 6 5          | 0.258                   | -       | 9644.48  | -          |
| 5        | 13     | 3 5 1             | 0.274                    | 1 0 6 5          | 0.258                   | -       | 9842.22  | -          |
| 6        | 13     | 2 7 1             | 0.337                    | 2 0 5 4          | 0.333                   | -       | 10068.2  | -          |
| 7        | 13     | 1 5 3             | 0.429                    | 3 1 3 2          | 0.218                   | -       | 11153.9  | -          |
| 8        | 13     | 3 1 3             | 0.429                    | 6 0 1 0          | 0.268                   | -       | 11333.1  | -          |
| 9        | 13     | 3 1 3             | 0.429                    | 6 0 1 0          | 0.268                   | -       | 11492.4  | -          |
| 10       | 13     | 1 5 3             | 0.429                    | 3 1 3 2          | 0.219                   | -       | 11665.6  | -          |
| 11       | 13     | 0 3 5             | 0.578                    | 3 2 2 1          | 0.365                   | -       | 13258.9  | -          |
| 12       | 13     | 1 1 5             | 0.578                    | 5 1 1 0          | 0.289                   | -       | 13400.6  | -          |
| Symmetry |        | $\Pi_u$           |                          |                  |                         |         |          |            |
| 1        | 1      | 0 1 0             | 1.000                    | 0 0 1 0          | 1.000                   | 667.38  | 667.584  | -0.20      |
| 1        | 3      | 1 1 0             | 0.528                    | 0 0 2 1          | 0.472                   | 1932.47 | 1933.69  | -1.22      |
| 2        | 3      | 0 3 0             | 0.528                    | 0 0 2 1          | 0.528                   | 2076.86 | 2076.18  | 0.68       |
| 1        | 5      | 1 3 0             | 0.508                    | 1 0 2 1          | 0.508                   | 3181.46 | 3182.85  | -1.38      |
| 2        | 5      | 2 1 0             | 0.592                    | 0 0 3 2          | 0.401                   | 3339.36 | 3339.53  | -0.18      |
| 3        | 5      | 1 3 0             | 0.484                    | 0 0 3 2          | 0.351                   | 3500.67 | 3499.36  | 1.31       |
| 4        | 5      | 0 1 2             | 1.00                     | 1 1 1 0          | 0.503                   | 5315.71 | 5315.64  | 0.07       |
| 1        | 7      | 1 5 0             | 0.396                    | 1 0 3 2          | 0.396                   | 4416.15 | 4416.74  | -0.59      |
| 2        | 7      | 3 1 0             | 0.485                    | 0 0 4 3          | 0.273                   | 4591.12 | 4591.13  | -0.01      |
| 3        | 7      | 3 1 0             | 0.366                    | 0 0 4 3          | 0.345                   | 4753.45 | 4753.29  | 0.16       |
| 4        | 7      | 1 5 0             | 0.446                    | 0 0 4 3          | 0.251                   | 4938.39 | 4936.93  | 1.45       |
| 5        | 7      | 0 3 2             | 0.515                    | 1 1 2 1          | 0.259                   | 6537.96 | 6538.2   | -0.24      |
| 6        | 7      | 1 1 2             | 0.515                    | 1 1 2 1          | 0.244                   | 6679.71 | 6679.64  | 0.07       |
| 1        | 9      | 2 5 0             | 0.390                    | 1 1 3 2          | 0.194                   | -       | 5637.23  | -          |
| 2        | 9      | 4 1 0             | 0.317                    | 0 0 5 4          | 0.178                   | -       | 5829.73  | -          |
| 3        | 9      | 4 1 0             | 0.478                    | 0 0 5 4          | 0.263                   | -       | 6000.22  | -          |
| 4        | 9      | 3 3 0             | 0.360                    | 0 0 5 4          | 0.306                   | 6179.01 | 6179.38  | -0.37      |
| 5        | 9      | 1 7 0             | 0.396                    | 1 0 4 3          | 0.396                   | 6388.08 | 6387.24  | 0.85       |
| 6        | 9      | 1 3 2             | 0.508                    | 3 0 2 1          | 0.379                   | 7743.7  | 7743.27  | 0.43       |
| 7        | 9      | 2 1 2             | 0.595                    | 4 0 1 0          | 0.446                   | 7901.48 | 7901.59  | -0.11      |
| 8        | 9      | 1 3 2             | 0.492                    | 3 0 2 1          | 0.366                   | 8056.02 | 8056.54  | -0.52      |
| 9        | 9      | 0 1 4             | 1.000                    | 2 2 1 0          | 0.379                   | -       | 9864.51  | -          |
| 1        | 11     | 2 7 0             | 0.342                    | 1 1 4 3          | 0.170                   | -       | 6845.89  | -          |
| 2        | 11     | 4 3 0             | 0.336                    | 2 2 2 1          | 0.124                   | -       | 7055.39  | -          |
| 3        | 11     | 5 1 0             | 0.465                    | 0 0 6 5          | 0.187                   | -       | 7238.43  | -          |
| 4        | 11     | 5 1 0             | 0.287                    | 0 0 6 5          | 0.260                   | -       | 7416.89  | -          |
| 5        | 11     | 3 5 0             | 0.286                    | 0 0 6 5          | 0.270                   | 7616.62 | 7618.49  | -1.87      |
| 6        | 11     | 1 9 0             | 0.344                    | 1 0 5 4          | 0.344                   | -       | 7848.58  | -          |
| 7        | 11     | 1 5 2             | 0.419                    | 3 0 3 2          | 0.312                   | -       | 8933.07  | -          |
| 8        | 11     | 3 1 2             | 0.449                    | 1 1 4 3          | 0.149                   | -       | 9110.52  | -          |
| 9        | 11     | 3 1 2             | 0.408                    | 1 1 4 3          | 0.165                   | -       | 9270.52  | -          |
| 10       | 11     | 1 5 2             | 0.436                    | 3 0 3 2          | 0.325                   | -       | 9447.02  | -          |
| 11       | 11     | 0 3 4             | 0.557                    | 2 2 2 1          | 0.211                   | -       | 11043.3  | -          |
| 12       | 11     | 1 1 4             | 0.557                    | 2 2 2 1          | 0.168                   | -       | 11184.7  | -          |
| 1        | 13     | 3 7 0             | 0.330                    | 1 1 5 4          | 0.131                   | -       | 8043.97  | -          |
| 2        | 13     | 5 3 0             | 0.292                    | 1 0 6 5          | 0.208                   | -       | 8268.95  | -          |
| 3        | 13     | 6 1 0             | 0.370                    | 0 0 7 6          | 0.127                   | -       | 8466.45  | -          |
| 4        | 13     | 6 1 0             | 0.396                    | 0 0 7 6          | 0.193                   | -       | 8648.82  | -          |
| 5        | 13     | 5 3 0             | 0.307                    | 0 0 7 6          | 0.257                   | -       | 8845.33  | -          |
| 6        | 13     | 4 5 0             | 0.271                    | 0 0 7 6          | 0.236                   | -       | 9069.47  | -          |
| 7        | 13     | 2 9 0             | 0.335                    | 1 1 5 4          | 0.166                   | -       | 9319.58  | -          |
| 8        | 13     | 2 5 2             | 0.385                    | 4 0 3 2          | 0.289                   | -       | 10109.7  | -          |
| 9        | 13     | 3 3 2             | 0.316                    | 1 1 5 4          | 0.103                   | -       | 10305.7  | -          |
| 10       | 13     | 4 1 2             | 0.493                    | 1 1 5 4          | 0.136                   | -       | 10476.6  | -          |
| 11       | 13     | 3 3 2             | 0.357                    | 1 1 5 4          | 0.142                   | -       | 10650.   | -          |
| 12       | 13     | 1 7 2             | 0.377                    | 3 0 4 3          | 0.281                   | -       | 10849.9  | -          |
| 13       | 13     | 1 3 4             | 0.502                    | 4 1 2 1          | 0.286                   | -       | 12204.3  | -          |
| 14       | 13     | 2 1 4             | 0.590                    | 2 2 3 2          | 0.154                   | -       | 12365.   | -          |
| 15       | 13     | 1 3 4             | 0.494                    | 4 1 2 1          | 0.281                   | -       | 12516.   | -          |
| 16       | 13     | 0 1 6             | 1.000                    | 3 3 1 0          | 0.318                   | -       | 14315.   | -          |

| State    | Polyad     | State<br>(normal) | Contribution<br>(normal) | State<br>(local) | Contribution<br>(local) | Exp.    | Energies<br>Theor. | $\Delta E$ |
|----------|------------|-------------------|--------------------------|------------------|-------------------------|---------|--------------------|------------|
| Symmetry | $\Delta_g$ |                   |                          |                  |                         |         |                    |            |
| 1        | 2          | 0 2 0             | 1.000                    | 0 0 2 0          | 1.000                   | 1335.13 | 1335.47            | -0.34      |
| 1        | 4          | 1 2 0             | 0.539                    | 0 0 3 1          | 0.461                   | 2585.02 | 2586.35            | -1.32      |
| 2        | 4          | 0 4 0             | 0.539                    | 0 0 3 1          | 0.539                   | 2760.73 | 2759.96            | 0.77       |
| 1        | 6          | 1 4 0             | 0.505                    | 1 0 3 1          | 0.505                   | 3821.98 | 3823.28            | -1.30      |
| 2        | 6          | 2 2 0             | 0.561                    | 0 0 4 2          | 0.427                   | 4007.91 | 4008.14            | -0.23      |
| 3        | 6          | 1 4 0             | 0.484                    | 0 0 4 2          | 0.345                   | 4197.36 | 4195.99            | 1.37       |
| 4        | 6          | 0 2 2             | 1.000                    | 1 1 2 0          | 0.503                   | 5958.51 | 5958.48            | 0.03       |
| 1        | 8          | 2 4 0             | 0.387                    | 1 1 3 1          | 0.193                   | -       | 5047.37            | -          |
| 2        | 8          | 3 2 0             | 0.471                    | 0 0 5 3          | 0.282                   | 5245.47 | 5245.53            | -0.06      |
| 3        | 8          | 0 8 0             | 0.365                    | 0 0 5 3          | 0.365                   | -       | 5437.23            | -          |
| 4        | 8          | 1 6 0             | 0.440                    | 0 0 5 3          | 0.239                   | -       | 5643.56            | -          |
| 5        | 8          | 1 2 2             | 0.504                    | 1 1 3 1          | 0.249                   | 7166.05 | 7166.14            | -0.09      |
| 6        | 8          | 0 4 2             | 0.504                    | 1 1 3 1          | 0.254                   | 7338.15 | 7338.14            | 0.01       |
| 1        | 10         | 2 6 0             | 0.387                    | 1 1 4 2          | 0.192                   | -       | 6259.77            | -          |
| 2        | 10         | 4 2 0             | 0.329                    | 0 0 6 4          | 0.174                   | -       | 6471.83            | -          |
| 3        | 10         | 4 2 0             | 0.442                    | 0 0 6 4          | 0.284                   | -       | 6670.62            | -          |
| 4        | 10         | 3 4 0             | 0.351                    | 0 0 6 4          | 0.313                   | -       | 6875.93            | -          |
| 5        | 10         | 1 8 0             | 0.385                    | 1 0 5 3          | 0.385                   | -       | 7101.84            | -          |
| 6        | 10         | 1 4 2             | 0.507                    | 3 0 3 1          | 0.378                   | -       | 8359.54            | -          |
| 7        | 10         | 2 2 2             | 0.566                    | 1 1 4 2          | 0.217                   | -       | 8544.58            | -          |
| 8        | 10         | 1 4 2             | 0.491                    | 3 0 3 1          | 0.366                   | -       | 8728.1             | -          |
| 9        | 10         | 0 2 4             | 1.000                    | 2 2 2 0          | 0.380                   | -       | 10482.5            | -          |
| 1        | 12         | 3 6 0             | 0.323                    | 1 1 5 3          | 0.160                   | -       | 7461.55            | -          |
| 2        | 12         | 4 4 0             | 0.317                    | 1 0 6 4          | 0.246                   | -       | 7687.22            | -          |
| 3        | 12         | 5 2 0             | 0.434                    | 0 0 7 5          | 0.197                   | -       | 7895.45            | -          |
| 4        | 12         | 0 12 0            | 0.277                    | 0 0 7 5          | 0.277                   | -       | 8102.26            | -          |
| 5        | 12         | 3 6 0             | 0.269                    | 0 0 7 5          | 0.269                   | -       | 8324.91            | -          |
| 6        | 12         | 2 8 0             | 0.334                    | 1 1 5 3          | 0.166                   | -       | 8569.79            | -          |
| 7        | 12         | 1 6 2             | 0.396                    | 3 0 4 2          | 0.295                   | -       | 9540.05            | -          |
| 8        | 12         | 3 2 2             | 0.446                    | 1 1 5 3          | 0.153                   | -       | 9739.52            | -          |
| 9        | 12         | 3 2 2             | 0.384                    | 1 1 5 3          | 0.177                   | -       | 9928.69            | -          |
| 10       | 12         | 1 6 2             | 0.430                    | 3 0 4 2          | 0.320                   | -       | 10128.9            | -          |
| 11       | 12         | 0 4 4             | 0.531                    | 2 2 3 1          | 0.201                   | -       | 11646.8            | -          |
| 12       | 12         | 1 2 4             | 0.531                    | 2 2 3 1          | 0.178                   | -       | 11818.             | -          |
| 1        | 14         | 3 8 0             | 0.328                    | 2 1 5 3          | 0.244                   | -       | 8653.63            | -          |
| 2        | 14         | 5 4 0             | 0.299                    | 1 0 7 5          | 0.200                   | -       | 8892.23            | -          |
| 3        | 14         | 6 2 0             | 0.362                    | 0 0 8 6          | 0.127                   | -       | 9111.18            | -          |
| 4        | 14         | 6 2 0             | 0.364                    | 0 0 8 6          | 0.208                   | -       | 9322.07            | -          |
| 5        | 14         | 5 4 0             | 0.298                    | 0 0 8 6          | 0.267                   | -       | 9542.82            | -          |
| 6        | 14         | 4 6 0             | 0.272                    | 0 0 8 6          | 0.231                   | -       | 9783.78            | -          |
| 7        | 14         | 2 10 0            | 0.333                    | 1 1 6 4          | 0.165                   | -       | 10046.4            | -          |
| 8        | 14         | 2 6 2             | 0.386                    | 4 0 4 2          | 0.290                   | -       | 10709.             | -          |
| 9        | 14         | 4 2 2             | 0.293                    | 1 1 6 4          | 0.099                   | -       | 10922.9            | -          |
| 10       | 14         | 4 2 2             | 0.455                    | 1 1 6 4          | 0.147                   | -       | 11120.8            | -          |
| 11       | 14         | 3 4 2             | 0.346                    | 1 1 6 4          | 0.147                   | -       | 11321.2            | -          |
| 12       | 14         | 1 8 2             | 0.366                    | 3 0 5 3          | 0.273                   | -       | 11539.9            | -          |
| 13       | 14         | 1 4 4             | 0.505                    | 4 1 3 1          | 0.287                   | -       | 12796.6            | -          |
| 14       | 14         | 2 2 4             | 0.565                    | 2 2 4 2          | 0.165                   | -       | 12982.6            | -          |
| 15       | 14         | 1 4 4             | 0.494                    | 4 1 3 1          | 0.282                   | -       | 13162.6            | -          |
| 16       | 14         | 0 2 6             | 1.000                    | 3 3 2 0          | 0.318                   | -       | 14908.3            | -          |
| Symmetry | $\Delta_u$ |                   |                          |                  |                         |         |                    |            |
| 1        | 4          | 0 2 1             | 1.000                    | 1 0 2 0          | 1.000                   | 3659.27 | 3659.41            | -0.14      |
| 1        | 6          | 1 2 1             | 0.522                    | 2 0 2 0          | 0.522                   | 4887.99 | 4888.69            | -0.71      |
| 2        | 6          | 0 4 1             | 0.522                    | 1 0 3 1          | 0.522                   | 5061.78 | 5061.39            | 0.39       |
| 1        | 8          | 1 4 1             | 0.506                    | 2 0 3 1          | 0.506                   | 6103.68 | 6103.86            | -0.18      |
| 2        | 8          | 2 2 1             | 0.564                    | 1 0 4 2          | 0.430                   | 6288.49 | 6288.72            | -0.23      |
| 3        | 8          | 1 4 1             | 0.488                    | 2 0 3 1          | 0.488                   | 6474.53 | 6474.31            | 0.22       |
| 4        | 8          | 0 2 3             | 1.000                    | 2 1 2 0          | 0.754                   | 8232.89 | 8232.8             | 0.08       |
| 1        | 10         | 1 6 1             | 0.385                    | 2 0 4 2          | 0.385                   | 7307.65 | 7306.15            | 1.50       |
| 2        | 10         | 3 2 1             | 0.459                    | 1 0 5 3          | 0.293                   | 7505.22 | 7504.9             | 0.32       |
| 3        | 10         | 3 2 1             | 0.367                    | 1 0 5 3          | 0.359                   | 7694.42 | 7695.22            | -0.80      |
| 4        | 10         | 1 6 1             | 0.436                    | 2 0 4 2          | 0.436                   | 7897.57 | 7898.4             | -0.83      |
| 5        | 10         | 0 4 3             | 0.513                    | 2 1 3 1          | 0.387                   | 9419.19 | 9418.8             | 0.39       |
| 6        | 10         | 1 2 3             | 0.513                    | 2 1 3 1          | 0.367                   | 9589.93 | 9590.32            | -0.39      |
| 1        | 12         | 2 6 1             | 0.387                    | 3 0 4 2          | 0.292                   | -       | 8496.8             | -          |
| 2        | 12         | 4 2 1             | 0.311                    | 2 0 5 3          | 0.239                   | -       | 8709.74            | -          |
| 3        | 12         | 4 2 1             | 0.450                    | 1 0 6 4          | 0.289                   | -       | 8907.99            | -          |
| 4        | 12         | 3 4 1             | 0.349                    | 1 0 6 4          | 0.303                   | -       | 9110.72            | -          |
| 5        | 12         | 1 8 1             | 0.376                    | 2 0 5 3          | 0.376                   | -       | 9333.              | -          |
| 6        | 12         | 1 4 3             | 0.507                    | 3 1 3 1          | 0.258                   | -       | 10590.4            | -          |
| 7        | 12         | 2 2 3             | 0.566                    | 5 0 2 0          | 0.349                   | -       | 10775.8            | -          |
| 8        | 12         | 1 4 3             | 0.493                    | 3 1 3 1          | 0.251                   | -       | 10957.5            | -          |
| 9        | 12         | 0 2 5             | 1.000                    | 3 2 2 0          | 0.633                   | -       | 12707.6            | -          |

| State    | Polyad | State<br>(normal) | Contribution<br>(normal) | State<br>(local) | Contribution<br>(local) | Exp.    | Energies<br>Theor. | $\Delta E$ |
|----------|--------|-------------------|--------------------------|------------------|-------------------------|---------|--------------------|------------|
| 1        | 14     | 2 8 1             | 0.330                    | 3 0 5 3          | 0.249                   | -       | 9676.9             | -          |
| 2        | 14     | 4 4 1             | 0.322                    | 2 0 6 4          | 0.248                   | -       | 9903.57            | -          |
| 3        | 14     | 5 2 1             | 0.428                    | 5 1 2 0          | 0.214                   | -       | 10111.9            | -          |
| 4        | 14     | 5 2 1             | 0.293                    | 1 0 7 5          | 0.276                   | -       | 10316.8            | -          |
| 5        | 14     | 0 12 1            | 0.257                    | 1 0 7 5          | 0.257                   | -       | 10536.1            | -          |
| 6        | 14     | 2 8 1             | 0.339                    | 2 0 6 4          | 0.320                   | -       | 10777.1            | -          |
| 7        | 14     | 1 6 3             | 0.406                    | 5 0 3 1          | 0.218                   | -       | 11749.2            | -          |
| 8        | 14     | 3 2 3             | 0.431                    | 6 0 2 0          | 0.269                   | -       | 11949.5            | -          |
| 9        | 14     | 3 2 3             | 0.400                    | 2 1 5 3          | 0.260                   | -       | 12137.7            | -          |
| 10       | 14     | 1 6 3             | 0.424                    | 3 1 4 2          | 0.216                   | -       | 12335.             | -          |
| 11       | 14     | 0 4 5             | 0.549                    | 3 2 3 1          | 0.347                   | -       | 13850.2            | -          |
| 12       | 14     | 1 2 5             | 0.548                    | 3 2 3 1          | 0.286                   | -       | 14021.4            | -          |
| Symmetry |        | $\Phi_g$          |                          |                  |                         |         |                    |            |
| 1        | 5      | 0 3 1             | 1.000                    | 1 0 3 0          | 1.000                   | 4314.92 | 4315.05            | -0.14      |
| 1        | 7      | 1 3 1             | 0.533                    | 2 0 3 0          | 0.533                   | 5531.3  | 5531.88            | -0.58      |
| 2        | 7      | 0 5 1             | 0.533                    | 1 0 4 1          | 0.533                   | 5730.61 | 5730.2             | 0.41       |
| 1        | 9      | 1 5 1             | 0.504                    | 2 0 4 1          | 0.504                   | 6736.79 | 6736.56            | 0.22       |
| 2        | 9      | 2 3 1             | 0.547                    | 1 0 5 2          | 0.444                   | 6944.87 | 6944.95            | -0.08      |
| 3        | 9      | 1 5 1             | 0.487                    | 2 0 4 1          | 0.487                   | 7154.75 | 7154.47            | 0.28       |
| 4        | 9      | 0 3 3             | 1.000                    | 2 1 3 0          | 0.755                   | 8863.68 | 8863.48            | 0.20       |
| 1        | 11     | 2 5 1             | 0.390                    | 2 0 5 2          | 0.368                   | -       | 7929.98            | -          |
| 2        | 11     | 3 3 1             | 0.454                    | 1 0 6 3          | 0.295                   | -       | 8149.56            | -          |
| 3        | 11     | 0 9 1             | 0.373                    | 1 0 6 3          | 0.373                   | -       | 8364.              | -          |
| 4        | 11     | 1 7 1             | 0.433                    | 2 0 5 2          | 0.433                   | -       | 8588.04            | -          |
| 5        | 11     | 1 3 3             | 0.503                    | 2 1 4 1          | 0.375                   | -       | 10037.3            | -          |
| 6        | 11     | 0 5 3             | 0.503                    | 2 1 4 1          | 0.380                   | -       | 10234.             | -          |
| 1        | 13     | 2 7 1             | 0.384                    | 3 0 5 2          | 0.290                   | -       | 9113.02            | -          |
| 2        | 13     | 4 3 1             | 0.321                    | 2 0 6 3          | 0.256                   | -       | 9344.12            | -          |
| 3        | 13     | 4 3 1             | 0.427                    | 1 0 7 4          | 0.301                   | -       | 9565.43            | -          |
| 4        | 13     | 3 5 1             | 0.342                    | 1 0 7 4          | 0.310                   | -       | 9790.59            | -          |
| 5        | 13     | 1 9 1             | 0.370                    | 2 0 6 3          | 0.370                   | -       | 10030.6            | -          |
| 6        | 13     | 1 5 3             | 0.506                    | 3 1 4 1          | 0.257                   | -       | 11198.9            | -          |
| 7        | 13     | 2 3 3             | 0.550                    | 5 0 3 0          | 0.339                   | -       | 11406.8            | -          |
| 8        | 13     | 1 5 3             | 0.493                    | 3 1 4 1          | 0.251                   | -       | 11612.5            | -          |
| 9        | 13     | 0 3 5             | 1.000                    | 3 2 3 0          | 0.633                   | -       | 13313.5            | -          |
| Symmetry |        | $\Phi_u$          |                          |                  |                         |         |                    |            |
| 1        | 3      | 0 3 0             | 1.000                    | 0 0 3 0          | 1.000                   | 2003.25 | 2003.65            | -0.41      |
| 1        | 5      | 1 3 0             | 0.549                    | 0 0 4 1          | 0.451                   | 3240.62 | 3241.95            | -1.33      |
| 2        | 5      | 0 5 0             | 0.549                    | 0 0 4 1          | 0.549                   | 3442.22 | 3441.39            | 0.82       |
| 1        | 7      | 1 5 0             | 0.502                    | 1 0 4 1          | 0.502                   | -       | 4468.21            | -          |
| 2        | 7      | 2 3 0             | 0.544                    | 0 0 5 2          | 0.442                   | -       | 4677.05            | -          |
| 3        | 7      | 1 5 0             | 0.483                    | 0 0 5 2          | 0.345                   | 4890.1  | 4888.72            | 1.37       |
| 4        | 7      | 0 3 2             | 1.000                    | 1 1 3 0          | 0.503                   | 6601.72 | 6601.63            | 0.09       |
| 1        | 9      | 2 5 0             | 0.399                    | 1 1 4 1          | 0.198                   | -       | 5683.23            | -          |
| 2        | 9      | 3 3 0             | 0.464                    | 0 0 6 3          | 0.285                   | -       | 5902.8             | -          |
| 3        | 9      | 0 9 0             | 0.379                    | 0 0 6 3          | 0.379                   | -       | 6118.76            | -          |
| 4        | 9      | 1 7 0             | 0.437                    | 0 0 6 3          | 0.235                   | -       | 6345.7             | -          |
| 5        | 9      | 1 3 2             | 0.518                    | 1 1 4 1          | 0.242                   | -       | 7796.97            | -          |
| 6        | 9      | 0 5 2             | 0.518                    | 1 1 4 1          | 0.261                   | -       | 7994.36            | -          |
| 1        | 11     | 2 7 0             | 0.382                    | 1 1 5 2          | 0.190                   | -       | 6887.83            | -          |
| 2        | 11     | 4 3 0             | 0.336                    | 0 0 7 4          | 0.169                   | -       | 7118.66            | -          |
| 3        | 11     | 4 3 0             | 0.421                    | 0 0 7 4          | 0.296                   | -       | 7340.9             | -          |
| 4        | 11     | 3 5 0             | 0.344                    | 0 0 7 4          | 0.320                   | -       | 7568.48            | -          |
| 5        | 11     | 1 9 0             | 0.378                    | 1 0 6 3          | 0.378                   | -       | 7811.83            | -          |
| 6        | 11     | 1 5 2             | 0.505                    | 3 0 4 1          | 0.377                   | -       | 8980.08            | -          |
| 7        | 11     | 2 3 2             | 0.549                    | 1 1 5 2          | 0.225                   | -       | 9188.17            | -          |
| 8        | 11     | 1 5 2             | 0.490                    | 3 0 4 1          | 0.365                   | -       | 9395.7             | -          |
| 9        | 11     | 0 3 4             | 1.000                    | 2 2 3 0          | 0.380                   | -       | 11100.7            | -          |
| 1        | 13     | 3 7 0             | 0.333                    | 1 1 6 3          | 0.152                   | -       | 8082.81            | -          |
| 2        | 13     | 4 5 0             | 0.301                    | 1 0 7 4          | 0.249                   | -       | 8324.87            | -          |
| 3        | 13     | 5 3 0             | 0.416                    | 0 0 8 5          | 0.201                   | -       | 8554.85            | -          |
| 4        | 13     | 0 13 0            | 0.289                    | 0 0 8 5          | 0.289                   | -       | 8784.81            | -          |
| 5        | 13     | 0 13 0            | 0.270                    | 0 0 8 5          | 0.270                   | -       | 9026.72            | -          |
| 6        | 13     | 2 9 0             | 0.335                    | 1 1 6 3          | 0.166                   | -       | 9286.44            | -          |
| 7        | 13     | 2 5 2             | 0.381                    | 4 0 4 1          | 0.285                   | -       | 10151.9            | -          |
| 8        | 13     | 3 3 2             | 0.444                    | 1 1 6 3          | 0.154                   | -       | 10371.6            | -          |
| 9        | 13     | 0 9 2             | 0.367                    | 1 1 6 3          | 0.185                   | -       | 10584.7            | -          |
| 10       | 13     | 1 7 2             | 0.428                    | 3 0 5 2          | 0.319                   | -       | 10806.             | -          |
| 11       | 13     | 0 5 4             | 0.513                    | 2 2 4 1          | 0.194                   | -       | 12253.1            | -          |
| 12       | 13     | 1 3 4             | 0.513                    | 2 2 4 1          | 0.185                   | -       | 12449.1            | -          |

| State               | Polyad | State<br>(normal) | Contribution<br>(normal) | State<br>(local) | Contribution<br>(local) | Exp.    | Energies<br>Theor. | $\Delta E$ |
|---------------------|--------|-------------------|--------------------------|------------------|-------------------------|---------|--------------------|------------|
| Symmetry $\Gamma_g$ |        |                   |                          |                  |                         |         |                    |            |
| 1                   | 4      | 0 4 0             | 1.000                    | 0 0 4 0          | 1.000                   | 2671.72 | 2672.14            | -0.42      |
| 1                   | 6      | 1 4 0             | 0.557                    | 0 0 5 1          | 0.443                   | 3898.33 | 3899.57            | -1.24      |
| 2                   | 6      | 0 6 0             | 0.557                    | 0 0 5 1          | 0.557                   | 4122.27 | 4121.41            | 0.86       |
| 1                   | 8      | 1 6 0             | 0.499                    | 1 0 5 1          | 0.499                   | -       | 5116.31            | -          |
| 2                   | 8      | 2 4 0             | 0.532                    | 0 0 6 2          | 0.450                   | -       | 5346.27            | -          |
| 3                   | 8      | 1 6 0             | 0.483                    | 0 0 6 2          | 0.347                   | -       | 5578.89            | -          |
| 4                   | 8      | 0 4 2             | 1.000                    | 1 1 4 0          | 0.503                   | -       | 7245.07            | -          |
| 1                   | 10     | 2 6 0             | 0.408                    | 1 1 5 1          | 0.203                   | -       | 6322.98            | -          |
| 2                   | 10     | 3 4 0             | 0.459                    | 0 0 7 3          | 0.285                   | -       | 6561.96            | -          |
| 3                   | 10     | 0 10 0            | 0.388                    | 0 0 7 3          | 0.388                   | -       | 6798.92            | -          |
| 4                   | 10     | 1 8 0             | 0.436                    | 0 0 7 3          | 0.233                   | -       | 7044.61            | -          |
| 5                   | 10     | 1 4 2             | 0.529                    | 1 1 5 1          | 0.237                   | -       | 8429.79            | -          |
| 6                   | 10     | 0 6 2             | 0.529                    | 1 1 5 1          | 0.266                   | -       | 8649.19            | -          |
| 1                   | 12     | 2 8 0             | 0.378                    | 1 1 6 2          | 0.188                   | -       | 7520.23            | -          |
| 2                   | 12     | 4 4 0             | 0.342                    | 0 0 8 4          | 0.164                   | -       | 7768.65            | -          |
| 3                   | 12     | 4 4 0             | 0.406                    | 0 0 8 4          | 0.303                   | -       | 8011.27            | -          |
| 4                   | 12     | 3 6 0             | 0.339                    | 0 0 8 4          | 0.326                   | -       | 8258.47            | -          |
| 5                   | 12     | 1 10 0            | 0.375                    | 1 0 7 3          | 0.375                   | -       | 8518.28            | -          |
| 6                   | 12     | 1 6 2             | 0.503                    | 3 0 5 1          | 0.375                   | -       | 9603.68            | -          |
| 7                   | 12     | 2 4 2             | 0.537                    | 1 1 6 2          | 0.229                   | -       | 9832.2             | -          |
| 8                   | 12     | 1 6 2             | 0.489                    | 3 0 5 1          | 0.365                   | -       | 10060.7            | -          |
| 9                   | 12     | 0 4 4             | 1.000                    | 2 2 4 0          | 0.380                   | -       | 11719.3            | -          |
| 1                   | 14     | 3 8 0             | 0.339                    | 1 1 7 3          | 0.145                   | -       | 8708.65            | -          |
| 2                   | 14     | 4 6 0             | 0.286                    | 1 0 8 4          | 0.250                   | -       | 8966.59            | -          |
| 3                   | 14     | 5 4 0             | 0.404                    | 0 0 9 5          | 0.203                   | -       | 9215.86            | -          |
| 4                   | 14     | 0 14 0            | 0.297                    | 0 0 9 5          | 0.297                   | -       | 9465.81            | -          |
| 5                   | 14     | 0 14 0            | 0.272                    | 0 0 9 5          | 0.272                   | -       | 9725.31            | -          |
| 6                   | 14     | 2 10 0            | 0.336                    | 1 1 7 3          | 0.167                   | -       | 9999.41            | -          |
| 7                   | 14     | 2 6 2             | 0.392                    | 4 0 5 1          | 0.294                   | -       | 10767.5            | -          |
| 8                   | 14     | 3 4 2             | 0.443                    | 1 1 7 3          | 0.153                   | -       | 11005.8            | -          |
| 9                   | 14     | 0 10 2            | 0.378                    | 1 1 7 3          | 0.190                   | -       | 11239.6            | -          |
| 10                  | 14     | 1 8 2             | 0.427                    | 3 0 6 2          | 0.318                   | -       | 11479.9            | -          |
| 11                  | 14     | 1 4 4             | 0.501                    | 2 2 5 1          | 0.189                   | -       | 12861.3            | -          |
| 12                  | 14     | 0 6 4             | 0.501                    | 2 2 5 1          | 0.191                   | -       | 13078.9            | -          |
| Symmetry $\Gamma_u$ |        |                   |                          |                  |                         |         |                    |            |
| 1                   | 6      | 0 4 1             | 1.000                    | 1 0 4 0          | 1.000                   | 4970.93 | 4970.99            | -0.06      |
| 1                   | 8      | 1 4 1             | 0.543                    | 2 0 4 0          | 0.543                   | 6176.65 | 6177.08            | -0.43      |
| 2                   | 8      | 0 6 1             | 0.543                    | 1 0 5 1          | 0.543                   | 6398.07 | 6397.62            | 0.46       |
| 1                   | 10     | 1 6 1             | 0.502                    | 2 0 5 1          | 0.502                   | -       | 7372.39            | -          |
| 2                   | 10     | 2 4 1             | 0.535                    | 1 0 6 2          | 0.453                   | -       | 7601.55            | -          |
| 3                   | 10     | 1 6 1             | 0.486                    | 2 0 5 1          | 0.486                   | -       | 7832.03            | -          |
| 4                   | 10     | 0 4 3             | 1.000                    | 2 1 4 0          | 0.755                   | -       | 9494.46            | -          |
| 1                   | 12     | 2 6 1             | 0.400                    | 2 0 6 2          | 0.354                   | -       | 8557.62            | -          |
| 2                   | 12     | 3 4 1             | 0.451                    | 1 0 7 3          | 0.295                   | -       | 8796.18            | -          |
| 3                   | 12     | 0 10 1            | 0.384                    | 1 0 7 3          | 0.384                   | -       | 9031.49            | -          |
| 4                   | 12     | 1 8 1             | 0.432                    | 2 0 6 2          | 0.432                   | -       | 9274.4             | -          |
| 5                   | 12     | 1 4 3             | 0.515                    | 2 1 5 1          | 0.366                   | -       | 10657.8            | -          |
| 6                   | 12     | 0 6 3             | 0.515                    | 2 1 5 1          | 0.389                   | -       | 10876.3            | -          |
| 1                   | 14     | 2 8 1             | 0.380                    | 3 0 6 2          | 0.287                   | -       | 9733.46            | -          |
| 2                   | 14     | 4 4 1             | 0.328                    | 2 0 7 3          | 0.268                   | -       | 9981.7             | -          |
| 3                   | 14     | 4 4 1             | 0.412                    | 1 0 8 4          | 0.308                   | -       | 10223.1            | -          |
| 4                   | 14     | 3 6 1             | 0.338                    | 1 0 8 4          | 0.317                   | -       | 10467.9            | -          |
| 5                   | 14     | 1 10 1            | 0.367                    | 2 0 7 3          | 0.367                   | -       | 10724.5            | -          |
| 6                   | 14     | 1 6 3             | 0.505                    | 3 1 5 1          | 0.257                   | -       | 11810.3            | -          |
| 7                   | 14     | 2 4 3             | 0.539                    | 2 1 6 2          | 0.345                   | -       | 12038.3            | -          |
| 8                   | 14     | 1 6 3             | 0.492                    | 3 1 5 1          | 0.251                   | -       | 12265.             | -          |
| 9                   | 14     | 0 4 5             | 1.000                    | 3 2 4 0          | 0.633                   | -       | 13919.6            | -          |
| Symmetry $H_g$      |        |                   |                          |                  |                         |         |                    |            |
| 1                   | 7      | 0 5 1             | 1.000                    | 1 0 5 0          | 1.000                   | 5627.25 | 5627.24            | 0.02       |
| 1                   | 9      | 1 5 1             | 0.551                    | 2 0 5 0          | 0.551                   | -       | 6823.79            | -          |
| 2                   | 9      | 0 7 1             | 0.551                    | 1 0 6 1          | 0.551                   | 7064.52 | 7064.1             | 0.42       |
| 1                   | 11     | 1 7 1             | 0.499                    | 2 0 6 1          | 0.499                   | -       | 8010.63            | -          |
| 2                   | 11     | 2 5 1             | 0.526                    | 1 0 7 2          | 0.458                   | -       | 8258.49            | -          |
| 3                   | 11     | 1 7 1             | 0.485                    | 2 0 6 1          | 0.485                   | -       | 8507.75            | -          |
| 4                   | 11     | 0 5 3             | 1.000                    | 2 1 5 0          | 0.755                   | -       | 10125.7            | -          |
| 1                   | 13     | 2 7 1             | 0.407                    | 2 0 7 2          | 0.343                   | -       | 9188.3             | -          |
| 2                   | 13     | 3 5 1             | 0.450                    | 1 0 8 3          | 0.293                   | -       | 9444.26            | -          |
| 3                   | 13     | 0 11 1            | 0.392                    | 1 0 8 3          | 0.392                   | -       | 9698.15            | -          |
| 4                   | 13     | 1 9 1             | 0.432                    | 2 0 7 2          | 0.432                   | -       | 9958.3             | -          |
| 5                   | 13     | 1 5 3             | 0.526                    | 2 1 6 1          | 0.358                   | -       | 11279.8            | -          |
| 6                   | 13     | 0 7 3             | 0.526                    | 2 1 6 1          | 0.397                   | -       | 11517.6            | -          |

| State    | Polyad | State<br>(normal) | Contribution<br>(normal) | State<br>(local) | Contribution<br>(local) | Exp.    | Energies<br>Theor. | $\Delta E$ |
|----------|--------|-------------------|--------------------------|------------------|-------------------------|---------|--------------------|------------|
| Symmetry |        | Hu                |                          |                  |                         |         |                    |            |
| 1        | 5      | 0 5 0             | 1.000                    | 0 0 5 0          | 1.000                   | 3340.72 | 3340.92            | -0.20      |
| 1        | 7      | 1 5 0             | 0.564                    | 0 0 6 1          | 0.436                   | -       | 4558.73            | -          |
| 2        | 7      | 0 7 0             | 0.564                    | 0 0 6 1          | 0.564                   | -       | 4800.49            | -          |
| 1        | 9      | 1 7 0             | 0.496                    | 1 0 6 1          | 0.496                   | -       | 5766.85            | -          |
| 2        | 9      | 2 5 0             | 0.523                    | 0 0 7 2          | 0.455                   | -       | 6015.78            | -          |
| 3        | 9      | 1 7 0             | 0.481                    | 0 0 7 2          | 0.351                   | -       | 6267.2             | -          |
| 4        | 9      | 0 5 2             | 1.000                    | 1 1 5 0          | 0.503                   | -       | 7888.81            | -          |
| 1        | 11     | 2 7 0             | 0.414                    | 1 1 6 1          | 0.206                   | -       | 6965.82            | -          |
| 2        | 11     | 3 5 0             | 0.457                    | 0 0 8 3          | 0.284                   | -       | 7222.55            | -          |
| 3        | 11     | 0 11 0            | 0.396                    | 0 0 8 3          | 0.396                   | -       | 7478.21            | -          |
| 4        | 11     | 1 9 0             | 0.436                    | 0 0 8 3          | 0.233                   | -       | 7741.08            | -          |
| 5        | 11     | 1 5 2             | 0.539                    | 1 1 6 1          | 0.232                   | -       | 9064.11            | -          |
| 6        | 11     | 0 7 2             | 0.539                    | 1 1 6 1          | 0.271                   | -       | 9303.12            | -          |
| 1        | 13     | 2 9 0             | 0.373                    | 1 1 7 2          | 0.186                   | -       | 8156.15            | -          |
| 2        | 13     | 4 5 0             | 0.346                    | 0 0 9 4          | 0.159                   | -       | 8421.01            | -          |
| 3        | 13     | 4 5 0             | 0.394                    | 0 0 9 4          | 0.308                   | -       | 8681.85            | -          |
| 4        | 13     | 3 7 0             | 0.336                    | 0 0 9 4          | 0.331                   | -       | 8946.69            | -          |
| 5        | 13     | 1 11 0            | 0.373                    | 1 0 8 3          | 0.373                   | -       | 9221.92            | -          |
| 6        | 13     | 1 7 2             | 0.501                    | 3 0 6 1          | 0.374                   | -       | 10229.7            | -          |
| 7        | 13     | 2 5 2             | 0.529                    | 1 1 7 2          | 0.232                   | -       | 10476.6            | -          |
| 8        | 13     | 1 7 2             | 0.488                    | 3 0 6 1          | 0.364                   | -       | 10723.9            | -          |
| 9        | 13     | 0 5 4             | 1.000                    | 2 2 5 0          | 0.380                   | -       | 12338.1            | -          |
| Symmetry |        | Ig                |                          |                  |                         |         |                    |            |
| 1        | 6      | 0 6 0             | 1.000                    | 0 0 6 0          | 1.000                   | 4010.07 | 4010.              | 0.06       |
| 1        | 8      | 1 6 0             | 0.570                    | 0 0 7 1          | 0.430                   | -       | 5219.13            | -          |
| 2        | 8      | 0 8 0             | 0.570                    | 0 0 7 1          | 0.570                   | -       | 5478.93            | -          |
| 1        | 10     | 1 8 0             | 0.494                    | 1 0 7 1          | 0.494                   | -       | 6419.38            | -          |
| 2        | 10     | 2 6 0             | 0.516                    | 0 0 8 2          | 0.458                   | -       | 6685.59            | -          |
| 3        | 10     | 1 8 0             | 0.480                    | 0 0 8 2          | 0.355                   | -       | 6954.13            | -          |
| 4        | 10     | 0 6 2             | 1.000                    | 1 1 6 0          | 0.503                   | -       | 8532.85            | -          |
| 1        | 12     | 2 8 0             | 0.419                    | 1 1 7 1          | 0.208                   | -       | 7611.21            | -          |
| 2        | 12     | 3 6 0             | 0.455                    | 0 0 9 3          | 0.282                   | -       | 7884.3             | -          |
| 3        | 12     | 0 12 0            | 0.402                    | 0 0 9 3          | 0.402                   | -       | 8156.92            | -          |
| 4        | 12     | 1 10 0            | 0.436                    | 0 0 9 3          | 0.235                   | -       | 8435.63            | -          |
| 5        | 12     | 1 6 2             | 0.547                    | 1 1 7 1          | 0.228                   | -       | 9699.67            | -          |
| 6        | 12     | 0 8 2             | 0.547                    | 1 1 7 1          | 0.275                   | -       | 9956.41            | -          |
| 1        | 14     | 2 10 0            | 0.369                    | 1 1 8 2          | 0.183                   | -       | 8795.03            | -          |
| 2        | 14     | 4 6 0             | 0.351                    | 0 0 10 4         | 0.155                   | -       | 9075.27            | -          |
| 3        | 14     | 4 6 0             | 0.385                    | 0 0 10 4         | 0.311                   | -       | 9352.65            | -          |
| 4        | 14     | 0 14 0            | 0.337                    | 0 0 10 4         | 0.337                   | -       | 9633.6             | -          |
| 5        | 14     | 1 12 0            | 0.373                    | 1 0 9 3          | 0.373                   | -       | 9923.27            | -          |
| 6        | 14     | 1 8 2             | 0.499                    | 3 0 7 1          | 0.372                   | -       | 10857.6            | -          |
| 7        | 14     | 2 6 2             | 0.522                    | 1 1 8 2          | 0.234                   | -       | 11121.3            | -          |
| 8        | 14     | 1 8 2             | 0.487                    | 3 0 7 1          | 0.363                   | -       | 11385.6            | -          |
| 9        | 14     | 0 6 4             | 1.000                    | 2 2 6 0          | 0.380                   | -       | 12957.3            | -          |
| Symmetry |        | Iu                |                          |                  |                         |         |                    |            |
| 1        | 8      | 0 6 1             | 1.000                    | 1 0 6 0          | 1.000                   | 6283.98 | 6283.78            | 0.19       |
| 1        | 10     | 1 6 1             | 0.559                    | 2 0 6 0          | 0.559                   | -       | 7471.75            | -          |
| 2        | 10     | 0 8 1             | 0.559                    | 1 0 7 1          | 0.559                   | -       | 7729.95            | -          |
| 1        | 12     | 1 8 1             | 0.497                    | 2 0 7 1          | 0.497                   | -       | 8650.83            | -          |
| 2        | 12     | 2 6 1             | 0.519                    | 1 0 8 2          | 0.462                   | -       | 8915.75            | -          |
| 3        | 12     | 1 8 1             | 0.484                    | 2 0 7 1          | 0.484                   | -       | 9182.08            | -          |
| 4        | 12     | 0 6 3             | 1.000                    | 2 1 6 0          | 0.755                   | -       | 10757.3            | -          |
| 1        | 14     | 2 8 1             | 0.413                    | 2 0 8 2          | 0.334                   | -       | 9821.48            | -          |
| 2        | 14     | 3 6 1             | 0.449                    | 1 0 9 3          | 0.291                   | -       | 10093.5            | -          |
| 3        | 14     | 0 12 1            | 0.398                    | 1 0 9 3          | 0.398                   | -       | 10364.2            | -          |
| 4        | 14     | 1 10 1            | 0.432                    | 2 0 8 2          | 0.432                   | -       | 10640.3            | -          |
| 5        | 14     | 1 6 3             | 0.535                    | 2 1 7 1          | 0.351                   | -       | 11903.             | -          |
| 6        | 14     | 0 8 3             | 0.535                    | 2 1 7 1          | 0.404                   | -       | 12158.4            | -          |
| Symmetry |        | Jg                |                          |                  |                         |         |                    |            |
| 1        | 9      | 0 7 1             | 1.000                    | 1 0 7 0          | 1.000                   | -       | 6940.62            | -          |
| 1        | 11     | 1 7 1             | 0.566                    | 2 0 7 0          | 0.566                   | -       | 8120.76            | -          |
| 2        | 11     | 0 9 1             | 0.566                    | 1 0 8 1          | 0.566                   | -       | 8395.34            | -          |
| 1        | 13     | 1 9 1             | 0.495                    | 2 0 8 1          | 0.495                   | -       | 9292.69            | -          |
| 2        | 13     | 2 7 1             | 0.513                    | 1 0 9 2          | 0.464                   | -       | 9573.32            | -          |
| 3        | 13     | 1 9 1             | 0.482                    | 2 0 8 1          | 0.482                   | -       | 9855.34            | -          |
| 4        | 13     | 0 7 3             | 1.000                    | 2 1 7 0          | 0.755                   | -       | 11389.2            | -          |

| State       | Polyad | State<br>(normal) | Contribution<br>(normal) | State<br>(local) | Contribution<br>(local) | Exp. | Energies<br>Theor. | $\Delta E$ |
|-------------|--------|-------------------|--------------------------|------------------|-------------------------|------|--------------------|------------|
| Symmetry Ju |        |                   |                          |                  |                         |      |                    |            |
| 1           | 7      | 0 7 0             | 1.000                    | 0 0 7 0          | 1.000                   | -    | 4679.39            | -          |
| 1           | 9      | 1 7 0             | 0.577                    | 0 0 8 1          | 0.423                   | -    | 5880.59            | -          |
| 2           | 9      | 0 9 0             | 0.577                    | 0 0 8 1          | 0.577                   | -    | 6156.91            | -          |
| 1           | 11     | 1 9 0             | 0.492                    | 1 0 8 1          | 0.492                   | -    | 7073.59            | -          |
| 2           | 11     | 2 7 0             | 0.510                    | 0 0 9 2          | 0.460                   | -    | 7355.71            | -          |
| 3           | 11     | 1 9 0             | 0.479                    | 0 0 9 2          | 0.359                   | -    | 7639.99            | -          |
| 4           | 11     | 0 7 2             | 1.000                    | 1 1 7 0          | 0.503                   | -    | 9177.19            | -          |
| 1           | 13     | 2 9 0             | 0.423                    | 1 1 8 1          | 0.210                   | -    | 8258.75            | -          |
| 2           | 13     | 3 7 0             | 0.454                    | 0 0 10 3         | 0.279                   | -    | 8547.04            | -          |
| 3           | 13     | 0 13 0            | 0.407                    | 0 0 10 3         | 0.407                   | -    | 8835.22            | -          |
| 4           | 13     | 1 11 0            | 0.436                    | 0 0 10 3         | 0.237                   | -    | 9128.64            | -          |
| 5           | 13     | 1 7 2             | 0.554                    | 1 1 8 1          | 0.224                   | -    | 10336.3            | -          |
| 6           | 13     | 0 9 2             | 0.555                    | 1 1 8 1          | 0.279                   | -    | 10609.3            | -          |
| Symmetry Kg |        |                   |                          |                  |                         |      |                    |            |
| 1           | 8      | 0 8 0             | 1.000                    | 0 0 8 0          | 1.000                   | -    | 5349.07            | -          |
| 1           | 10     | 1 8 0             | 0.582                    | 0 0 9 1          | 0.418                   | -    | 6542.98            | -          |
| 2           | 10     | 0 10 0            | 0.582                    | 0 0 9 1          | 0.582                   | -    | 6834.56            | -          |
| 1           | 12     | 1 10 0            | 0.489                    | 1 0 9 1          | 0.489                   | -    | 7729.24            | -          |
| 2           | 12     | 2 8 0             | 0.505                    | 0 0 10 2         | 0.462                   | -    | 8026.12            | -          |
| 3           | 12     | 1 10 0            | 0.477                    | 0 0 10 2         | 0.364                   | -    | 8324.99            | -          |
| 4           | 12     | 0 8 2             | 1.000                    | 1 1 8 0          | 0.503                   | -    | 9821.84            | -          |
| 1           | 14     | 2 10 0            | 0.427                    | 1 1 9 1          | 0.212                   | -    | 8908.18            | -          |
| 2           | 14     | 3 8 0             | 0.453                    | 0 0 11 3         | 0.276                   | -    | 9210.64            | -          |
| 3           | 14     | 0 14 0            | 0.412                    | 0 0 11 3         | 0.412                   | -    | 9513.24            | -          |
| 4           | 14     | 1 12 0            | 0.436                    | 0 0 11 3         | 0.240                   | -    | 9820.38            | -          |
| 5           | 14     | 1 8 2             | 0.561                    | 1 1 9 1          | 0.220                   | -    | 10973.8            | -          |
| 6           | 14     | 0 10 2            | 0.561                    | 1 1 9 1          | 0.283                   | -    | 11261.8            | -          |
| Symmetry Ku |        |                   |                          |                  |                         |      |                    |            |
| 1           | 10     | 0 8 1             | 1.000                    | 1 0 8 0          | 1.000                   | -    | 7597.77            | -          |
| 1           | 12     | 1 8 1             | 0.572                    | 2 0 8 0          | 0.572                   | -    | 8770.7             | -          |
| 2           | 12     | 0 10 1            | 0.572                    | 1 0 9 1          | 0.572                   | -    | 9060.41            | -          |
| 1           | 14     | 1 10 1            | 0.493                    | 2 0 9 1          | 0.493                   | -    | 9935.98            | -          |
| 2           | 14     | 2 8 1             | 0.509                    | 1 0 10 2         | 0.465                   | -    | 10231.2            | -          |
| 3           | 14     | 1 10 1            | 0.481                    | 2 0 9 1          | 0.481                   | -    | 10527.8            | -          |
| 4           | 14     | 0 8 3             | 1.000                    | 2 1 8 0          | 0.755                   | -    | 12021.4            | -          |
| Symmetry Lg |        |                   |                          |                  |                         |      |                    |            |
| 1           | 11     | 0 9 1             | 1.000                    | 1 0 9 0          | 1.000                   | -    | 8255.21            | -          |
| 1           | 13     | 1 9 1             | 0.578                    | 2 0 9 0          | 0.578                   | -    | 9421.47            | -          |
| 2           | 13     | 0 11 1            | 0.578                    | 1 0 10 1         | 0.578                   | -    | 9725.25            | -          |
| Symmetry Lu |        |                   |                          |                  |                         |      |                    |            |
| 1           | 9      | 0 9 0             | 1.000                    | 0 0 9 0          | 1.000                   | -    | 6019.06            | -          |
| 1           | 11     | 1 9 0             | 0.588                    | 0 0 10 1         | 0.412                   | -    | 7206.2             | -          |
| 2           | 11     | 0 11 0            | 0.588                    | 0 0 10 1         | 0.588                   | -    | 7511.98            | -          |
| 1           | 13     | 1 11 0            | 0.487                    | 1 0 10 1         | 0.487                   | -    | 8386.17            | -          |
| 2           | 13     | 2 9 0             | 0.501                    | 0 0 11 2         | 0.462                   | -    | 8696.84            | -          |
| 3           | 13     | 1 11 0            | 0.475                    | 0 0 11 2         | 0.369                   | -    | 9009.32            | -          |
| 4           | 13     | 0 9 2             | 1.000                    | 1 1 9 0          | 0.503                   | -    | 10466.8            | -          |
| Symmetry Mg |        |                   |                          |                  |                         |      |                    |            |
| 1           | 10     | 0 10 0            | 1.000                    | 0 0 10 0         | 1.000                   | -    | 6689.34            | -          |
| 1           | 12     | 1 10 0            | 0.593                    | 0 0 11 1         | 0.407                   | -    | 7870.18            | -          |
| 2           | 12     | 0 12 0            | 0.593                    | 0 0 11 1         | 0.593                   | -    | 8189.24            | -          |
| 1           | 14     | 1 12 0            | 0.485                    | 1 0 11 1         | 0.485                   | -    | 9044.26            | -          |
| 2           | 14     | 2 10 0            | 0.497                    | 0 0 12 2         | 0.462                   | -    | 9367.85            | -          |
| 3           | 14     | 1 12 0            | 0.474                    | 0 0 12 2         | 0.373                   | -    | 9693.09            | -          |
| 4           | 14     | 0 10 2            | 1.000                    | 1 1 10 0         | 0.503                   | -    | 11112.             | -          |
| Symmetry Mu |        |                   |                          |                  |                         |      |                    |            |
| 1           | 12     | 0 10 1            | 1.000                    | 1 0 10 0         | 1.000                   | -    | 8912.96            | -          |
| 1           | 14     | 1 10 1            | 0.584                    | 2 0 10 0         | 0.584                   | -    | 10073.             | -          |
| 2           | 14     | 0 12 1            | 0.584                    | 1 0 11 1         | 0.584                   | -    | 10389.9            | -          |
